# Supplementary material
Source: PubMed Central journal article supplement (PMC3992653)
Supplement: 1312872111_pnas.201312872SI.pdf [file 1312872111_pnas.201312872SI.pdf]

# Supporting Information

Zarin et al. 10.1073/pnas.1312872111

## SI Methods

**Mice.** *Rag2*-deficient mice (1) were bred and maintained in the Sunnybrook Research Institute animal facility in specific pathogen-free conditions. *Id3*<sup>-/-</sup> mice were kindly provided by Y. Zhuang (Duke University, Durham, NC) (2) and backcrossed to C57BL/6 *Rag2*-deficient mice. All animal procedures were approved by the Sunnybrook Health Sciences Centre Animal Care Committee (Toronto, ON, Canada).

**Retroviral Transduction and Culture.** Retroviral constructs were generated, as previously described (3–5), by subcloning the cDNA of interest into the MigR1 or MIY plasmids, upstream of the internal ribosomal entry site, and stable retroviral-producing GP+E.86 packaging cell lines were generated for each construct. The KN6 T-cell receptor- $\gamma$  (TCR- $\gamma$ ) and TCR- $\delta$  subunits were cloned into pMiY as a fusion protein linked by the 2A Tescovirus linker peptide, as described previously (5). OP9-DL1, OP9-DL4, and OP9-Ctrl cells were produced and maintained as previously described (6, 7), and cocultures were supplemented with 1 ng/mL mouse recombinant IL-7 and 5 ng/mL human recombinant Flt-3L (Peprotech). Fetal livers (FL) were obtained from timed-pregnant *Rag2*<sup>-/-</sup> or *Rag2*<sup>-/-</sup>*Id3*<sup>-/-</sup> female mice on d 14 of gestation. Single-cell suspensions were generated by disruption through a 40- $\mu$ m nylon-mesh screen using a syringe plunger, and FL cells were cocultured with OP9-DL1 as previously described to produce double-negative (DN)3 cells (4). For retroviral transduction of DN3 cells, cells from d 7 FL/OP9-DL1 cocultures were passaged for an overnight coculture with stable retrovirus-producing GP+E.86 packaging cells. Following this step, the transduced (GFP<sup>+</sup> and YFP<sup>+</sup>) CD44<sup>-</sup> CD25<sup>+</sup> DN3 cells were purified by cell sorting and placed back onto OP9 cocultures, as previously described (4).

**Quantitative Real-Time PCR.** Thymocyte populations were purified by flow cytometry or selection using magnetic anti-CD45 beads (Miltenyi Biotech). Total RNA was extracted using TRIzol (Invitrogen) and converted to cDNA using Quantitect Reverse Transcription Kit (Qiagen) according to the manufacturer's instructions. Expression of the indicated genes was measured by quantitative real-time PCR using SYBR GreenER (Invitrogen).  $\beta$ -Actin was used to normalize cycle cycle thresholds.

**Generation of BALB/c Stromal Cells.** Ear dermal fibroblasts from BALB/c mice were isolated by incubating the minced and exposed epidermis layer with 0.3% trypsin/PBS. The minced pieces were

treated at 37 °C for 60 min, cut into smaller 2- to 3-mm squares, and subsequently incubated at 37 °C, in a 5% CO<sub>2</sub> incubator in medium (DMEM supplemented with 10% FBS) for 3–4 d, or until fibroblast outgrowth became confluent. The cells were then harvested, pelleted by centrifugation, and reseeded into a monolayer. Supernatants from retroviral-producing GP+E.86 packaging cell lines transfected with MigR1, MigR1-DL1, or MigR1-DL4 were used to transduce the BALB/c (B/c) fibroblasts and generate stable B/c-DL1, B/c-DL4, and B/c-Ctrl cell lines, as previously described (7, 8). Subsequently, BALB/c-DL4 and BALB/c-Ctrl lines were each retrovirally transduced to express pMiCherry or T22<sup>b</sup>-MiCherry (9) creating the four new cell lines BALB/c-Ctrl, BALB/c-T22, BALB/c-DL4, and BALB/c-DL4-T22.

**Precursor Frequency Analysis.** Limiting dilution analysis (LDA) was performed, as previously reported (3), using the automatic cell deposition unit function of the FACSaria cell sorter, such that 1, 3, 10, or 30, *Rag2*<sup>-/-</sup> DN3 (CD44<sup>-</sup>CD25<sup>+</sup>; in vitro-generated and retrovirally transduced as indicated above) YFP<sup>+</sup> GFP<sup>+</sup> cells were deposited into 96-well plates (48, 24, 24, and 12 well-replicates per dilution, respectively) containing OP9-DL4 or B/c-DL4 cells in OP9 medium supplemented with 1 ng/mL IL-7. After 7 d of culture, individual wells were scored for  $\alpha\beta$ - and  $\gamma\delta$ -lineage differentiation by flow cytometric analysis based on expression of CD45, and CD4<sup>+</sup> CD8<sup>+</sup>, or CD4<sup>-</sup> CD8<sup>-</sup> CD73<sup>hi</sup>, respectively. The  $\alpha\beta$ - and  $\gamma\delta$ -lineage precursor cell frequency was determined by the method of maximum-likelihood applied to the Poisson model (10).

**PMA and Ionomycin Stimulation.** CD45<sup>+</sup> GFP<sup>+</sup> cells were sorted from transduced DN3 cultured for 6 d on OP9-Ctrl, OP9-DL1, or BALB/c-DL4 cells. Sorted cells ( $5 \times 10^4$  cells per well of a 96-well plate) were subsequently cultured with 50 ng/mL PMA (Sigma) and 500 ng/mL Ionomycin (Sigma) in OP9 medium supplemented with 50 U/mL IL-2 (Peprotech). Supernatants were harvested after 36 h, and IFN- $\gamma$  levels were quantified using the DuoSet ELISA Development System (R&D Systems) according to the manufacturer's protocol.

**Statistics.** The data and error bars are presented as mean  $\pm$  SEM. To determine statistical significance a two-tailed unpaired Student *t* test was used for comparison between two experimental groups, using Prism software. Statistical significance was determined as  $P < 0.05$  (\* $P < 0.05$ ; \*\* $P < 0.01$ ), and, n.s. as nonsignificant.

1. Shinkai Y, et al. (1992) RAG-2-deficient mice lack mature lymphocytes owing to inability to initiate V(D)J rearrangement. *Cell* 68(5):855–867.
2. Pan L, Sato S, Frederick JP, Sun XH, Zhuang Y (1999) Impaired immune responses and B-cell proliferation in mice lacking the *Id3* gene. *Mol Cell Biol* 19(9):5969–5980.
3. Ciofani M, Knowles GC, Wiest DL, von Boehmer H, Zúñiga-Pflücker JC (2006) Stage-specific and differential notch dependency at the alphabeta and gammadelta T lineage bifurcation. *Immunity* 25(1):105–116.
4. Ciofani M, et al. (2004) Obligatory role for cooperative signaling by pre-TCR and Notch during thymocyte differentiation. *J Immunol* 172(9):5230–5239.
5. Lauritsen JP, et al. (2009) Marked induction of the helix-loop-helix protein *Id3* promotes the gammadelta T cell fate and renders their functional maturation Notch independent. *Immunity* 31(4):565–575.

6. Schmitt TM, Zúñiga-Pflücker JC (2002) Induction of T cell development from hematopoietic progenitor cells by delta-like-1 in vitro. *Immunity* 17(6):749–756.
7. Mohtashami M, et al. (2010) Direct comparison of Dll1- and Dll4-mediated Notch activation levels shows differential lymphomyeloid lineage commitment outcomes. *J Immunol* 185(2):867–876.
8. Mohtashami M, Shah DK, Kianizad K, Awong G, Zúñiga-Pflücker JC (2013) Induction of T-cell development by Delta-like 4-expressing fibroblasts. *Int Immunol* 25(10):601–611.
9. Coffey F, et al. (2014) The TCR ligand-inducible expression of CD73 marks  $\gamma\delta$  lineage commitment and a metastable intermediate in effector specification. *J Exp Med* 211(2):329–343.
10. de St. Groth F, Fazekas de St Groth (1982) The evaluation of limiting dilution assays. *J Immunol Methods* 49(2):R11–R23.

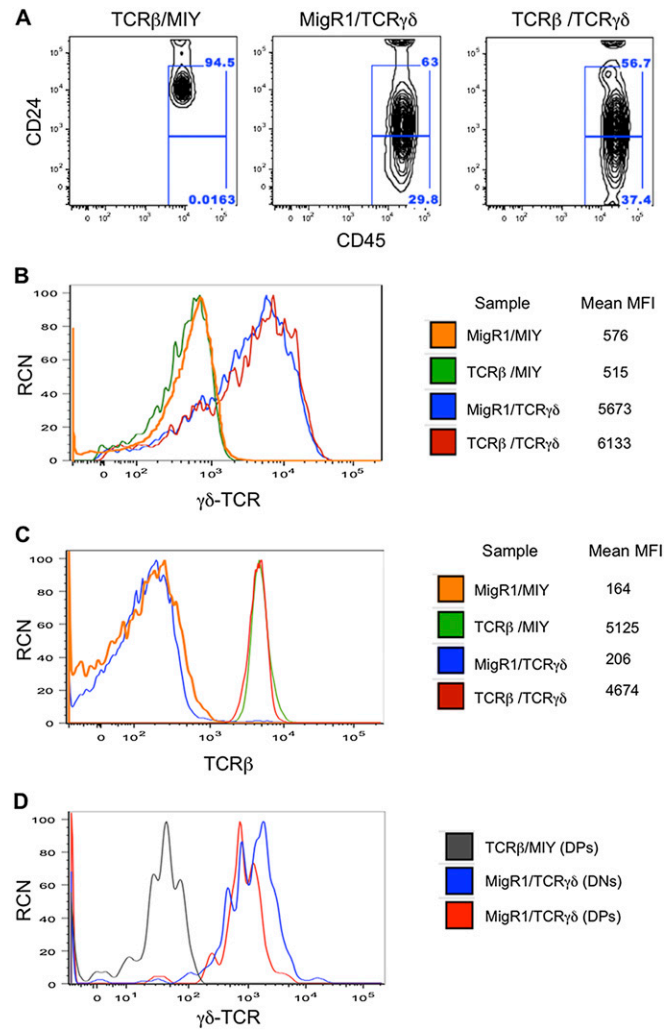

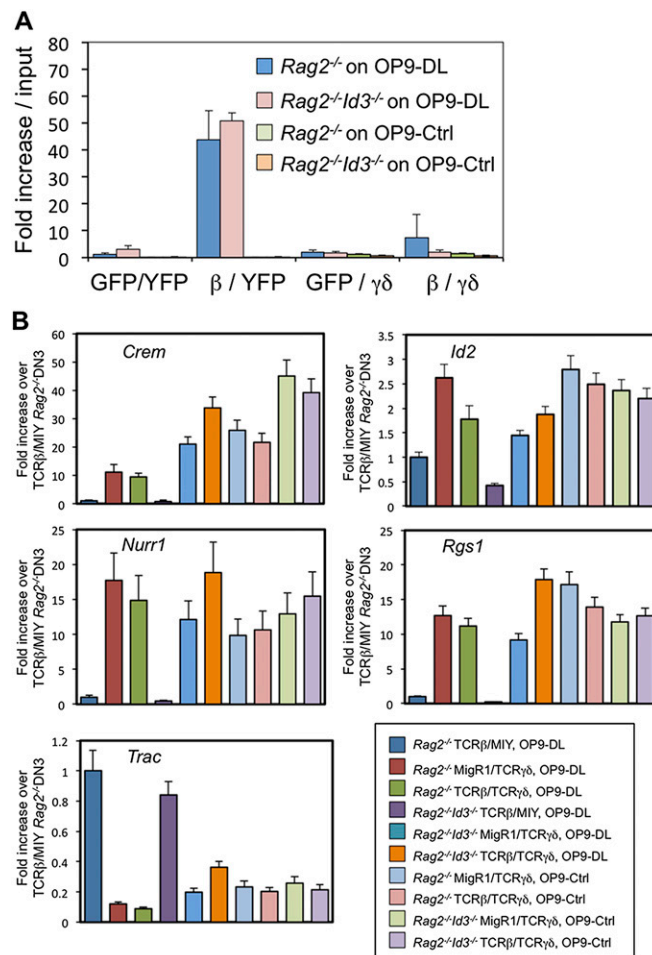

**Fig. S2.** Cellularity and gene expression analysis of pre-TCR or  $\gamma\delta$ -TCR-expressing cells. (A) Cellularity, fold-expansion over input, of in vitro-derived  $Rag2^{-/-}$  DN3 or  $Rag2^{-/-}Id3^{-/-}$  DN3 cells retrovirally transduced to express TCR- $\beta$ ,  $\gamma\delta$ -TCR, neither, or both, and cultured for 6 d with OP9-DL or OP9-Ctrl cells. (B) RNA was obtained from in vitro-derived  $Rag2^{-/-}$  DN3 or  $Rag2^{-/-}Id3^{-/-}$  DN3 cells retrovirally transduced to express TCR- $\beta$ ,  $\gamma\delta$ -TCR, neither, or both, and cultured for 6 d with OP9-DL1 or OP9-Ctrl cells. Quantitative RT-PCR analysis of  $\gamma\delta$ -biased genes: *Crem*, *Nurr1*, and *Rgs1*, and *Trac* (germ-line TCR- $\alpha$  constant region), in transduced  $Rag2^{-/-}$  DN3 or  $Rag2^{-/-}Id3^{-/-}$  DN3 cells cultured for 6 d on the indicated cells, with mRNA levels normalized to  $\beta$ -actin. Data are derived from at least three independent experiments. All data points for the  $\gamma\delta$ -TCR-expressing samples showed a significant difference ( $P < 0.01$ ) over the TCR- $\beta$ -transduced samples.

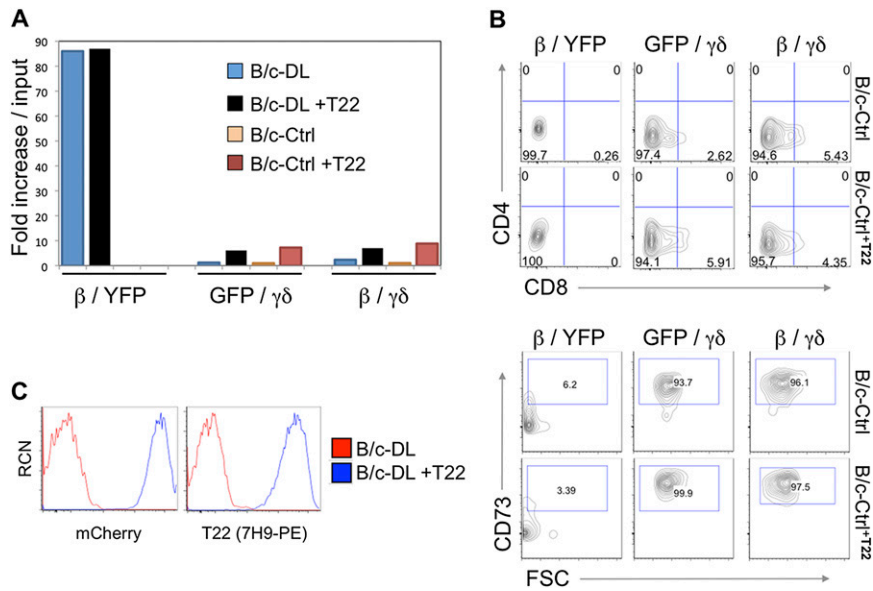

**Fig. S3.** Cellularity and flow cytometry analysis of TCR- $\beta$ ,  $\gamma\delta$ -TCR $^{-/-}$ , and TCR- $\beta/\gamma\delta$ -expressing DN3 cells cocultured on B/c-DL and B/c-Ctrl cells. (A) Cellularity, fold-increase over input, of in vitro-derived *Rag2* $^{-/-}$  DN3 cells retrovirally transduced to express TCR- $\beta$ ,  $\gamma\delta$ -TCR, neither, or both, and cultured for 5.5 d with B/c-DL4 or B/c-Ctrl cells transduced to express T22<sup>b</sup> or MCherry alone. (B) Development of in vitro-derived *Rag2* $^{-/-}$  DN3 cells retrovirally transduced to express TCR- $\beta$ ,  $\gamma\delta$ -TCR, or both, and cultured for 5.5 d with B/c-Ctrl cells expressing T22<sup>b</sup> or MCherry alone. Flow cytometric analysis of cell surface expression for CD4, CD8 and CD73, FSC. (C) Flow cytometric analysis of mCherry (Left) and T22<sup>b</sup> (Right) expression in B/c-DL4 cells transduced to express T22-MCherry or MCherry alone. Data are derived from at least three independent experiments.

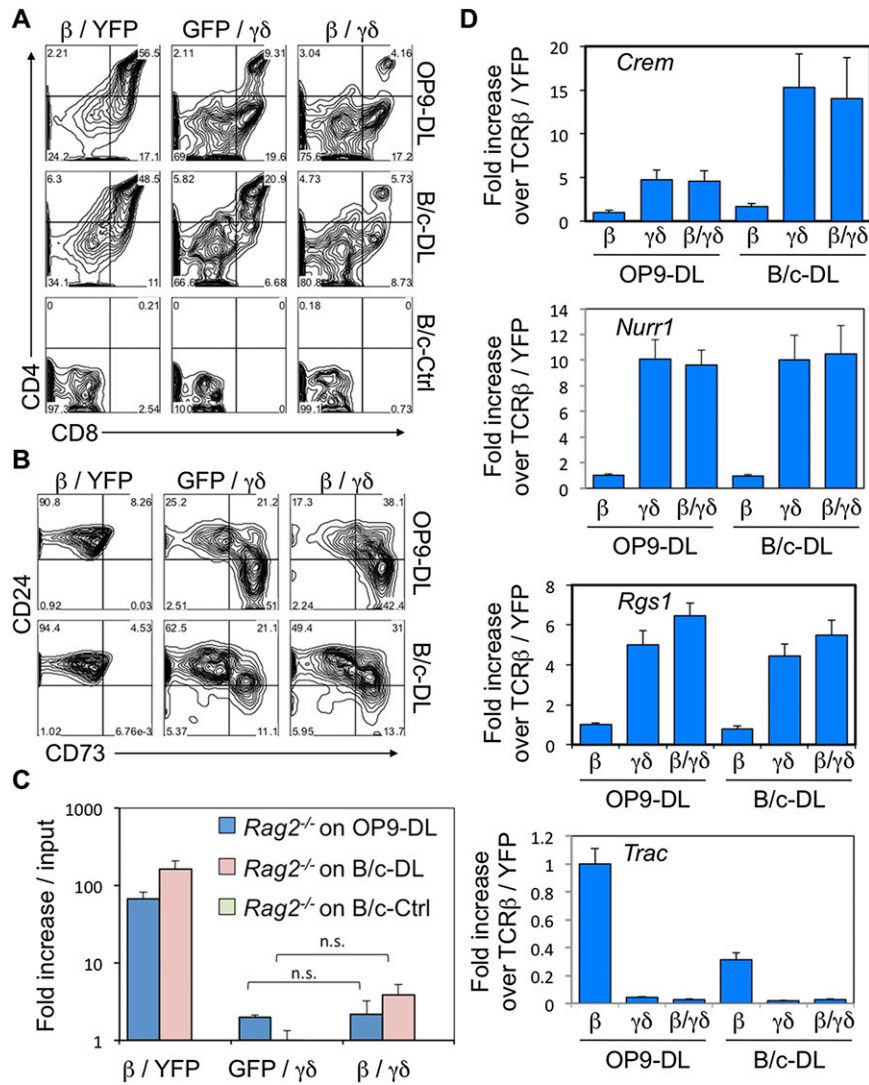

**Fig. 54.** Provision of a weak  $\gamma\delta$ -TCR ligand does not promote  $\alpha\beta$ -lineage choice in  $\gamma\delta$ -TCR-expressing DN3 cells, both in the presence and absence of Notch signals. (A and B) Development of in vitro-derived  $Rag2^{-/-}$  DN3 cells retrovirally transduced to express TCR- $\beta$ ,  $\gamma\delta$ -TCR, neither, or both, and cultured for 6 d with OP9-DL4, B/c-DL4, or B/c-Ctrl cells. Flow cytometric analysis of cell surface expression for CD4 and CD8 (A), and CD24 and CD73 (B) are shown for GFP<sup>+</sup> YFP<sup>+</sup>-gated cells; C shows the corresponding fold-expansion in cellularity. (D) Quantitative RT-PCR analysis of  $\gamma\delta$ -biased genes: *Creb*, *Nurr1*, and *Rgs1*, and *Trac* in transduced  $Rag2^{-/-}$  DN3 cells cultured for 6 d on the indicated cells, with mRNA levels normalized to  $\beta$ -actin.  $\beta$ ,  $\gamma\delta$ , and  $\beta/\gamma\delta$  represent TCR- $\beta$ /MIY<sup>-</sup>, MigR1/TCR- $\gamma\delta$ -, and TCR- $\beta$ /TCR- $\gamma\delta$ - transduced DN3 cells, respectively. Data are derived from at least three independent experiments. For D, all datapoints for the  $\gamma\delta$ -TCR-expressing samples showed a significant difference ( $P < 0.01$ ) over the TCR- $\beta$ -transduced samples.
